# Supplementary material for: High performance ozone decomposition over MnAl-based mixed oxide catalysts derived from layered double hydroxides
Source: Royal Society of Chemistry journal article supplement (doi:10.1039/d2ra04308d), 2022-01-01
Supplement: d2ra04308d1.pdf [file d2ra04308d1.pdf]

## **Supporting information**

### **High performance ozone decomposition over MnAl-based mixed oxide catalysts derived from layered double hydroxide**

Mingpan Shao, Wei Hong, Tianle Zhu, Xinxin Jiang, Ye Sun\*, Shiyu Hou

School of Space and Environment, Beihang University, Beijing 100191, China

#### **\*Corresponding author**

Ye Sun; Address: School of Space and Environment, Beihang University,  
Beijing 100191, China.

E-mail: [suny@buaa.edu.cn](mailto:suny@buaa.edu.cn) (Y. Sun).

## Supplementary Figures

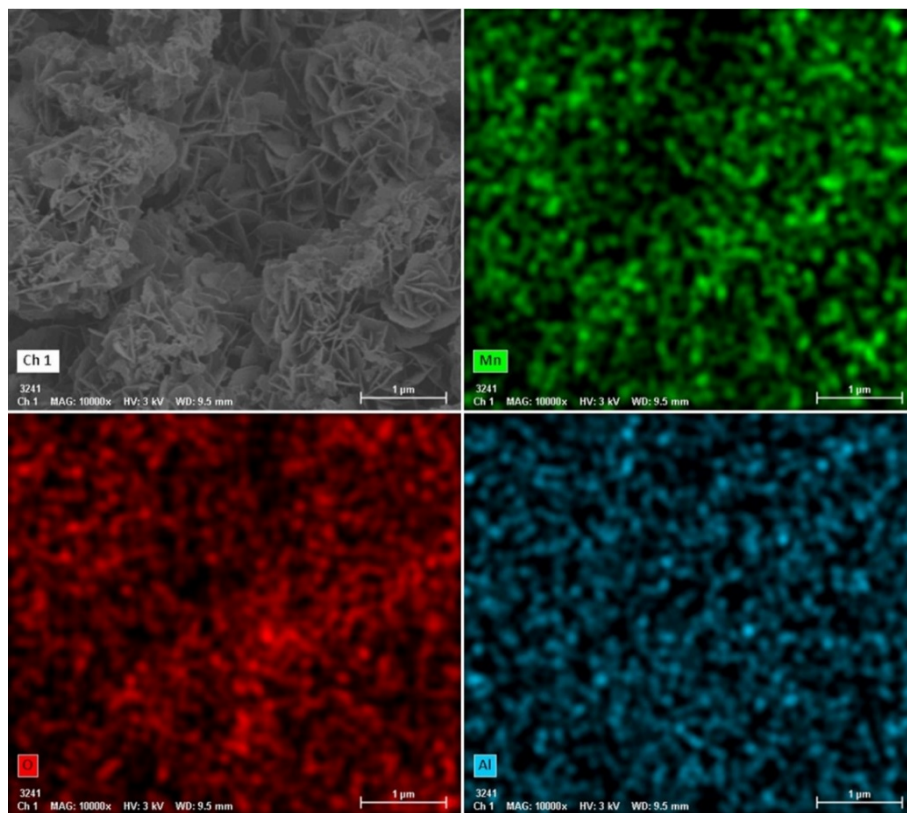

Fig.S1 SEM image and EDS mapping of the  $\text{Mn}_2\text{AlO-400}$  sample.

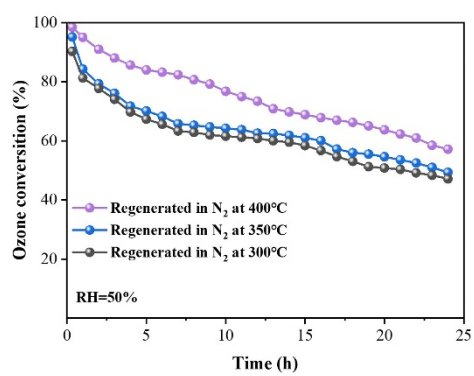

Fig. S2 Ozone conversion of  $\text{Mn}_2\text{AlO-400}$  after regeneration at 300-400 °C.

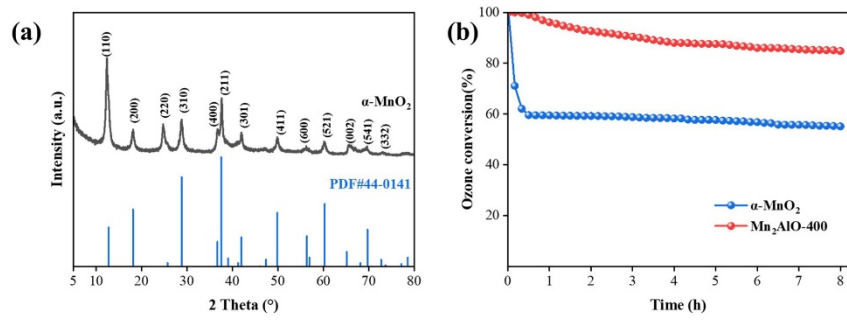

Fig.S3 (a) XRD pattern of  $\alpha$ -MnO<sub>2</sub>; (b) Ozone conversion over  $\alpha$ -MnO<sub>2</sub> and Mn<sub>2</sub>AlO-400 samples.
